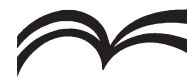

REVIEW ARTICLE

# Mechanisms and function of flower and inflorescence reversion

Fiona Tooke<sup>1</sup>, Matthew Ordidge<sup>2</sup>, Tinashe Chiurugwi<sup>2</sup> and Nick Battey<sup>2,\*</sup>

<sup>1</sup> Department of Plant Sciences, Cambridge University, Downing Street, Cambridge CB2 3EA, UK

<sup>2</sup> School of Biological Sciences, The University of Reading, Whiteknights, Reading RG6 6AS, UK

Received 12 April 2005; Accepted 22 June 2005

## Abstract

Flower and inflorescence reversion involve a switch from floral development back to vegetative development, thus rendering flowering a phase in an ongoing growth pattern rather than a terminal act of the meristem. Although it can be considered an unusual event, reversion raises questions about the nature and function of flowering. It is linked to environmental conditions and is most often a response to conditions opposite to those that induce flowering. Research on molecular genetic mechanisms underlying plant development over the last 15 years has pinpointed some of the key genes involved in the transition to flowering and flower development. Such investigations have also uncovered mutations which reduce floral maintenance or alter the balance between vegetative and floral features of the plant. How this information contributes to an understanding of floral reversion is assessed here. One issue that arises is whether floral commitment (defined as the ability to continue flowering when inductive conditions no longer exist) is a developmental switch affecting the whole plant or is a mechanism which assigns autonomy to individual meristems. A related question is whether floral or vegetative development is the underlying default pathway of the plant. This review begins by considering how studies of flowering in *Arabidopsis thaliana* have aided understanding of mechanisms of floral maintenance. *Arabidopsis* has not been found to revert to leaf production in any of the conditions or genetic backgrounds analysed to date. A clear-cut reversion to leaf production has, however, been described in *Impatiens balsamina*. It is proposed that a single gene controls whether *Impatiens* reverts or can maintain flowering when inductive conditions are removed, and it is inferred that this gene functions to control the

synthesis or transport of a leaf-generated signal. But it is also argued that the susceptibility of *Impatiens* to reversion is a consequence of the meristem-based mechanisms controlling development of the flower in this species. Thus, in *Impatiens*, a leaf-derived signal is critical for completion of flowering and can be considered to be the basis of a plant-wide floral commitment that is achieved without accompanying meristem autonomy. The evidence, derived from *in vitro* and other studies, that similar mechanisms operate in other species is assessed. It is concluded that most species (including *Arabidopsis*) are less prone to reversion because signals from the leaf are less ephemeral, and the pathways driving flower development have a high level of redundancy that generates meristem autonomy even when leaf-derived signals are weak. This gives stability to the flowering process, even where its initiation is dependent on environmental cues. On this interpretation, *Impatiens* reversion appears as an anomaly resulting from an unusual combination of leaf signalling and meristem regulation. Nevertheless, it is shown that the ability to revert can serve a function in the life history strategy (perenniality) or reproductive habit (pseudovivipary) of many plants. In these instances reversion has been assimilated into regular plant development and plays a crucial role there.

Key words: Floral development, floral induction, floral maintenance, floral reversion, meristem, perenniality, pseudovivipary.

## Introduction

Floral reversion is a return to leaf production after a period of flower development. A less strict definition is that there is a return to an earlier phase of development. There are two

\* To whom correspondence should be addressed. Fax: +44 (0)118 975 0630. E-mail: n.h.battey@reading.ac.uk

distinct types; inflorescence reversion in which vegetative development occurs after, or intercalated within, inflorescence development (Fig. 1) and flower reversion, in which the form of the flower itself is altered. The flower may be incomplete, with some parts replaced with leaves, or there may be proliferation after the formation of the normal complement of floral organs.

The most striking feature of reversion is its strong association with environmental conditions. This aspect of reversion is emphasized in Battey and Lyndon (1990). Reports of conditions causing reversion in various plant species are summarized in Table 1 of that review and more recent reports are presented here, as an up-date, in Table 1.

This review concentrates on the mechanisms and functions of flower and inflorescence reversion. Since 1990 there have been extensive studies of molecular mechanisms regulating flowering. The focus is on how this research (summarized in Table 2) informs understanding of reversion. Two plant species are considered in detail. The first is *Arabidopsis thaliana* which is small, has a rapid life cycle, a wide range of mutations, a completely sequenced genome and is, therefore, a model species for the study of flowering. Although reversions seen in this plant are from flower to inflorescence development and are therefore not true reversions to leaf production, the terminology, genetic interactions, and insight into floral maintenance derived from it are relevant to studies of reversion to leaf production.

The second species is *Impatiens balsamina*, in which the terminal flower reverts to leaf production consistently in response to transfer from inductive short days (SD) to long days (LD). The progress in identifying the genetic basis of this response is described.

The way in which findings for these two species relate to physiological, molecular, and *in vitro* reports of reversion in other plants is then discussed and the implications for the concept of floral commitment are considered. Finally, two cases are described in which reversion has a functional significance: perenniality and pseudovivipary.

## Mechanisms of inflorescence and flower reversion

### *Arabidopsis thaliana*

The transition to flowering in *Arabidopsis* is the culmination of a complex interaction of genes. The flowering time

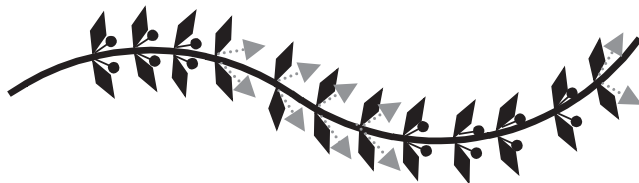

**Fig. 1.** Diagrammatic representation of inflorescence reversion. Filled circles represent flowers, filled triangles, vegetative axillary meristems.

**Table 1.** Environmental causes of flower and inflorescence reversion (additional to those listed in Table 1. Battey and Lyndon, 1990)

| Species                                                                                                    | Conditions causing flowering                                                              | Conditions causing reversion                                                                                                                         | Characteristics of reverted plants                                                                                                                                                                                                                                                                                                                                                                                               | Reference                                                                |
|------------------------------------------------------------------------------------------------------------|-------------------------------------------------------------------------------------------|------------------------------------------------------------------------------------------------------------------------------------------------------|----------------------------------------------------------------------------------------------------------------------------------------------------------------------------------------------------------------------------------------------------------------------------------------------------------------------------------------------------------------------------------------------------------------------------------|--------------------------------------------------------------------------|
| <i>Boronia megastigma</i>                                                                                  | Cool temperature (17/9 °C day/night)                                                      | Transfer to warm temperature (25/17 °C day/night)<br>'Commitment' requires 11–15 weeks of cool temperature                                           | Signs of reversion even when carpels formed. Young buds may form only leaf-like sepals before vegetative development. Older buds abort and are abscised.<br>Vegetative growth may be found in axils of bracts below these buds<br>Not described                                                                                                                                                                                  | Day <i>et al.</i> , 1994                                                 |
| <i>Eucalyptus lansdowneana</i><br>F. Muell. & J. Brown<br>subsp. <i>lansdowneana</i><br><i>Glycine max</i> | Enhanced by cold.<br>Daylength insensitive?<br>Short days                                 | Low solar radiation and short (0–5 weeks) cold treatment 15/10 °C<br>Transfer to long days                                                           | Trifoliolate leaves initiated in 2/5 phyllotaxy after initiation of floral bracts<br>Buds abort and vegetative shoot growth begins from adjacent tissue. Inflorescence reversion?<br>Distortions of first flowers to appear. Next buds to appear have no petals, stamens, or carpels but short bracts. Later buds still form in axil of bract but give rise to leaves<br>'succulent leaves grew up from the original flower bud' | Moncur, 1992<br>Washburn and Thomas, 2000<br>King, 1998<br>Landers, 1995 |
| <i>Hardenbergia violacea</i><br>cv. Mimi haha<br><i>Lupinus angustifolius</i><br>(some genotypes)          | Short days (<12.5 h) and cool temperature (15–18 °C)<br>Vernalization of 2–4 weeks (5 °C) | Transfer to long days<br>and/or warm temperature (22 °C)<br>Marginally too short a period of vernalization (much too short and plants do not flower) |                                                                                                                                                                                                                                                                                                                                                                                                                                  |                                                                          |
| <i>Suaeda salsa</i>                                                                                        | Short days (critical daylength 14 h)                                                      | Transfer to long days (16 h) after 4–6 SD cycles of 10 h<br>Short days                                                                               |                                                                                                                                                                                                                                                                                                                                                                                                                                  | Kefu <i>et al.</i> , 2002                                                |
| <i>Titanotrichum oldhamii</i>                                                                              | Natural populations flower in long days                                                   |                                                                                                                                                      | Meristem fate can be flower, proliferation of bracts or bulbil formation depending on environment                                                                                                                                                                                                                                                                                                                                | Wang and Cronk, 2003                                                     |
| <i>Whytockia bijjeensis</i><br>YZ-Wang & ZY Li                                                             | High humidity and/or moderate temperature?                                                | Low night temperature (12–14 °C) and low humidity (<75%)                                                                                             | Reversion after first sepals in first flower pair on inflorescence axis                                                                                                                                                                                                                                                                                                                                                          | Wang, 2001                                                               |

**Table 2.** Genetic causes of flower and inflorescence reversion

| Species                              | Gene                                                                                       | Gene type                                                        | Reversion phenotype                                                                                                                                                                                                                                                                        | Expression pattern                                                   | Possible role                                                                                                                                 | Reference                             |
|--------------------------------------|--------------------------------------------------------------------------------------------|------------------------------------------------------------------|--------------------------------------------------------------------------------------------------------------------------------------------------------------------------------------------------------------------------------------------------------------------------------------------|----------------------------------------------------------------------|-----------------------------------------------------------------------------------------------------------------------------------------------|---------------------------------------|
| <i>Arabidopsis thaliana</i>          | <i>Agamous-Like 24 (AGL24)</i>                                                             | MADS                                                             | Constitutive expression: flower reversion to inflorescence development erupting from ovary                                                                                                                                                                                                 | Shoot apical meristem and developing leaf primordia                  | WT: <i>LFY</i> and <i>API</i> must suppress <i>AGL24</i> which promotes inflorescence development                                             | Yu <i>et al.</i> , 2004               |
| <i>Arabidopsis thaliana</i>          | <i>Leafy (LFY)</i>                                                                         | Novel class                                                      | <i>lfy-6</i> mutant grown in SD: normal flower but ovary ruptures and ectopic flower-bearing shoot grows out                                                                                                                                                                               | Developing flower primordia and leaf primordia before flowering      | See text for discussion                                                                                                                       | Okamuro <i>et al.</i> , 1996          |
| <i>Arabidopsis thaliana</i>          | <i>Agamous (AG)</i>                                                                        | MADS box                                                         | <i>ag-1</i> mutant grown in SD: flowers formed of several whorls sepal, petal, petal repeated, then reversion to inflorescence meristem                                                                                                                                                    | Inner whorls of floral meristem                                      | See text for discussion                                                                                                                       | Okamuro <i>et al.</i> , 1996          |
| <i>Lycopersicon esculentum</i> Mill. | <i>Tomato MADS box 29 (TM29)</i>                                                           | MADS; similarity to <i>SEPALLATA</i> genes of <i>Arabidopsis</i> | Cosuppression/antisense <i>TM29</i> : ectopic shoots of partial leaves, secondary flowers from fruit                                                                                                                                                                                       | Vegetative, inflorescence and floral meristems and all floral organs | <i>TM29</i> role in floral meristem identity, maintenance, floral organ and fruit development                                                 | Ampomah-Dwamena <i>et al.</i> , 2002  |
| <i>Lycopersicon esculentum</i> Mill. | <i>Single Flower Truss (SFT)</i>                                                           | Unknown                                                          | Mutant: inflorescence produces normal flowers initially then reverts to produce vegetative shoot in the position of the next flower                                                                                                                                                        | Unknown                                                              | Promoter of flowering (mutants are late flowering) and regulator of floral transition and vegetative development programme via <i>SP</i> gene | Molinero-Rosales <i>et al.</i> , 2004 |
| <i>Petunia hybrida</i>               | <i>Floral Binding Protein 2 (FBP2)</i>                                                     | MADS Similarity to <i>TM5</i> (tomato). <i>SEPALLATA</i> -like   | Cosuppression <i>FBP2</i> : new inflorescences growing from axils of carpels                                                                                                                                                                                                               | Petals, stamens, carpels                                             | <i>FBP2</i> either (i) promotes floral transition, or (ii) represses inflorescence characteristics                                            | Angenent <i>et al.</i> , 1994         |
| <i>Zea mays</i>                      | <i>Indeterminate Floral Apex 1 (IFAI)</i> – double mutants with <i>ZAG1</i> or <i>IDS1</i> | Unknown                                                          | Double mutants: <i>ifa1</i> , <i>ids1</i> : return to earlier meristem type, spikelet becomes branch or spikelet pair meristem. <i>ifa1</i> , <i>zag1</i> : floral meristems become branch or spikelet meristems. Leaf-like glumes in spikelet, branching structures from centre of flower | Unknown                                                              | Regulation of meristem determinacy. <i>ifa1</i> mutants suffer loss of determinacy in spikelet, spikelet pair and floral meristems            | Laudencia-Chingcuanco and Hake, 2002  |
| <i>Zea mays</i>                      | <i>Indeterminate 1 (ID1)</i>                                                               | Zinc finger transcription factor                                 | Mutant is late flowering. Inflorescences have vegetative characteristics, plantlets grow out of spikelets                                                                                                                                                                                  | Immature leaves only                                                 | Promotes floral transition and maintenance, possibly by regulating synthesis/transport of floral stimulus                                     | Colasanti <i>et al.</i> , 1998        |
| <i>Zea mays</i>                      | <i>Zea FLO LFY 1 and 2 (ZFL 1 and 2)</i>                                                   | <i>FLO/LFY</i> homologues                                        | Mutants sometimes produce proliferous flowers and ectopic vegetative outgrowths                                                                                                                                                                                                            | Vegetative meristem, some leaf primordia. Reproductive development   | Similar role to <i>FLO/LFY</i> in the floral transition, meristem identity, phyllotaxy, floral organ identity regulation                      | Bombles <i>et al.</i> , 2003          |

genes control the response to the environment (light, daylength, temperature), autonomous/endogenous and hormonal signals. Integrator genes, at the intersection of these different pathways, regulate genes which control the transition to floral development in the meristem (Simpson and Dean, 2002). One concept of flowering time regulation proposes that the genetic pathways can be regarded as enabling and promoting (Boss *et al.*, 2004). Promoting pathways, for example, the photoperiod pathway in which *CONSTANS* (*CO*) plays a key role, lead to the activation of the integrator genes, whereas enabling pathways regulate the expression of floral repressors, for example, *FLOWERING LOCUS C* (*FLC*), and regulate meristem competence to flower. It is envisaged that the balance between the enablers and the promoters shifts during the life cycle of the plant, in response to the environment and to endogenous signals; it also shifts in different plant species, accounting for both the diversity and adaptability of flowering responses (Boss *et al.*, 2004).

Once the meristem has become directed to floral development, a final set of genes dictates the development of the organs of the flower (for a review see Jack, 2004); and the reproductive phase is completed with the cessation of growth of that meristem.

The *LEAFY* (*LFY*) gene has been identified as a key regulator in the flowering process (Weigel *et al.*, 1992; Weigel and Nilsson, 1995). It is an integrator in the terminology of Boss *et al.* (2004). *LEAFY* has its primary role in controlling the switch from inflorescence development to floral development and is up-regulated in response to inductive long day (LD) conditions and gibberellins (GA) (Blazquez *et al.*, 1998). Acting with *WUSCHEL* (*WUS*), a homeodomain gene, it activates *AGAMOUS* (*AG*) (Parcy *et al.*, 1998; Busch *et al.*, 1999). *AG* is a MADS-box transcription factor which controls the development of stamens and carpels in the flower (Yanofsky *et al.*, 1990) and also provides the 'stop' function to growth when flowering is complete, by repressing *WUS* (Fig. 2a; Lohmann *et al.*, 2001; Lenhard *et al.*, 2001). Along with the *CLAVATA* (*CLV*) genes, *WUS* plays a key role in maintaining a population of undifferentiated cells in the meristem (Fletcher, 2002; Tooke and Battey, 2003).

*CLV* and *WUS* maintain meristem function by regulating the accumulation of undifferentiated cells in the face of their loss to a differentiated state (Fig. 2b; Schoof *et al.*, 2000). Much less is known about the molecular mechanisms which ensure that floral development is maintained in the meristem.

In *Arabidopsis*, failure to maintain the floral state leads to a form of flower reversion in which an inflorescence grows out from a flower. It is rare that this occurs in wild-type *Arabidopsis*, although it may occur at a low frequency in the first flowers formed in a Landsberg *erecta* background in SD (Okamoto *et al.*, 1996). However, reversions to inflorescence development are frequently

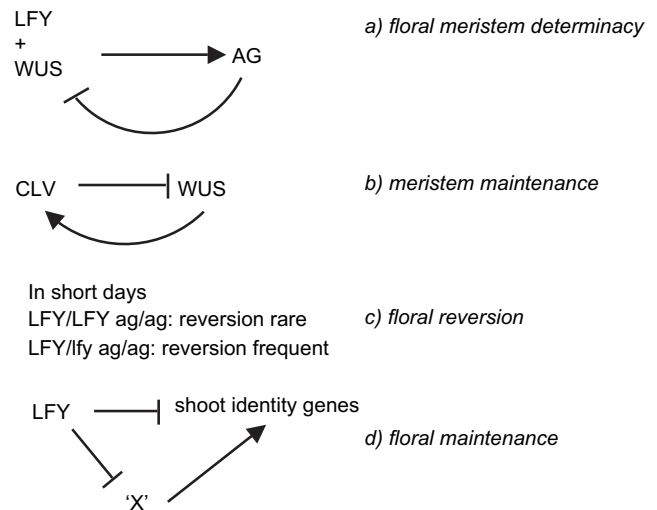

**Fig. 2.** Genetic pathways of meristem maintenance and determinacy in *Arabidopsis thaliana*. (a) Floral meristem determinacy: *AGAMOUS* (*AG*), a MADS-box *c* function gene specifying stamen and carpel identity, prevents further growth of the flower by shutting down meristem cell accumulation through repression of *WUS*. *ag* mutants produce indeterminate flowers. *LFY* and *WUS* promote expression of *AG* (Lohmann *et al.*, 2001; Lenhard *et al.*, 2001). (b) Meristem maintenance: the size of the expression domain of *WUSCHEL* (*WUS*), which promotes stem cell identity, is controlled by *CLAVATA* (*CLV*). The pool of meristematic cells is maintained by a self-regulating system with *WUS* promoting expression of *CLV3* (Schoof *et al.*, 2000; Fletcher, 2002). (c) Floral reversion: *LEAFY* (*LFY*) is able to reduce reversion frequency independently of *AG* as shown by the rarity of reversion in a homozygous *LFY* background (Parcy *et al.*, 2002). (d) Floral maintenance: in this model of floral maintenance *LFY* acts directly or via an intermediate factor ('X') to repress shoot identity genes, such as *TERMINAL FLOWER 1* (*TFL1*) (Parcy *et al.*, 2002). *LFY* also represses *AGAMOUS LIKE 24* (*AGL24*), a promoter of inflorescence identity (Yu *et al.*, 2004).

found in heterozygous *lfy-6* and homozygous *ag-1* mutants grown under SD conditions (Okamoto *et al.*, 1996), indicating that *LFY* and *AG* are critical to floral maintenance in *Arabidopsis*. The key role of *LFY* is demonstrated by the much greater frequency of reversion in *ag* mutants in a heterozygous *LFY* background (*LFY lfy*, *ag ag*) than in a homozygous *LFY* background (*LFY LFY*, *ag ag*). This result also reveals that the ability of *LFY* to maintain flowering can be independent of *AG* (Fig. 2c; Parcy *et al.*, 2002). Furthermore, experiments with a *LFY:VP16* transgene suggest that floral maintenance is achieved through transcriptional repression of shoot identity genes such as *TERMINAL FLOWER 1* (*TFL1*). *LFY* interacts with other, currently unknown factors to bring this about (Parcy *et al.*, 2002). It is also thought to act as a transcriptional repressor of *AGAMOUS-LIKE 24*. *AGL24* is a promoter of inflorescence fate. It is a MADS-box gene expressed in vegetative plants and in the transition to flowering. Overexpression of *AGL24* results in reversion to inflorescence development presumably because *LFY* and *APETALA1* (*API*) are unable to suppress it completely. In the reversion of *lfy-6* mutants, *AGL24* is found to be weakly suppressed (Fig. 2d; Yu *et al.*, 2004).

Although floral maintenance of *Arabidopsis* can be ascribed, in part, to transcriptional repression of shoot or inflorescence identity genes by *LFY*, both heterozygous *lfy-6* mutants and *ag-1* mutants only revert when grown in SD or when *ag* mutations are combined with a mutation in the photoperiod pathway (Okamoto *et al.*, 1996; Mizukami and Ma, 1997), which are less inductive conditions for this quantitative long-day plant. One explanation for this is that *LFY* is only expressed at a low level in weakly inductive conditions and this may reduce its capacity to repress shoot identity genes. Okamoto *et al.* (1996) were able to suppress SD-induced reversion of *ag-1* and heterozygous *lfy-6* mutants by blocking phytochrome activity (using a *hy-1* mutant background) or increasing gibberellins (endogenously in a *spindly* mutant background or by exogenous application). Night break treatments were also effective in causing some degree of suppression. A GA-mediated signal could be a requirement for floral maintenance and might operate by promoting expression of *LFY* or genes downstream of *LFY* or by suppressing shoot identity genes.

In the late flowering *Arabidopsis* ecotype *Sy-0*, the interaction of the gene *AERIAL ROSETTE 1* (*ART1*) with flowering time genes *FLC* and *FRIGIDA* (*FRI*) gives a phenotype defined by an enlarged basal rosette of leaves, aerial rosettes in the axils of cauline leaves, and inflorescence and flower reversion. Here, flowering time genes affect plant morphology as well as the transition to flowering. The phenotype is attributed to a deficiency of floral signals or poor competence to respond to them (Poduska *et al.*, 2003).

The importance of floral signal transport has been underlined by the report that the flowering time gene *CO* of *Arabidopsis* regulates the synthesis or transport of a floral signal (An *et al.*, 2004). The expression of *CO* in the phloem is sufficient to induce flowering, partly through cell-autonomous activation of *FLOWERING LOCUS T* (*FT*) and partly by an *FT*-independent pathway. The *FT* protein itself may move between cells or regulate synthesis of a floral signal. Notably, one possible target for *FT* in the meristem may be *API* (Ruiz-Garcia *et al.*, 1997) which Hempel *et al.* (1997) consider a consistent marker of commitment, always expressed after floral determination has been achieved in *Arabidopsis*. Gisel *et al.* (2002) have found that the point of floral commitment in *Arabidopsis* correlates with a reduction in the movement of a symplastic tracer from leaf to meristem; this finding might implicate a repressor in the flowering process. Movement of symplastic tracer resumes on further floral development.

### *Impatiens balsamina*

Initial research using mixed seed (giving plants with a range of flower colours) indicated that *Impatiens balsamina* cv. Dwarf Bush Flowered is a short day (SD) plant in which the majority of plants revert to leaf production when transferred

to long day (LD) conditions (Battey and Lyndon, 1984, 1990). An association of reversion with flower colour was noted, red-flowered plants giving a completely consistent reversion response (Battey, 1985). Red-flowered plants were therefore used for detailed molecular analysis of the reversion response described next. It was also noted, however, that purple-flowered plants consistently showed continued flower development even in non-inductive LD (Battey, 1985). These purple-flowered plants provided a useful resource for later physiological (Tooke *et al.*, 1998) and genetic analysis (described below).

With red-flowered plants, more short day (SD) cycles cause more of the flower to form before the return to leaf initiation (Pouteau *et al.*, 1997). For example, 5 SD is usually sufficient to bring about a change to whorled phyllotaxy, the loss of axillary structures, and the development of patches of pigment on bract-like leaves. With 8 SD plants are able to develop petals before reverting. The reverted meristem, whilst producing leaves, retains some level of floral determination as the leaves are produced in whorls and without axillary meristems and rapid reflowering occurs on transfer back to inductive conditions (Battey and Lyndon, 1986). A transition to a vegetative spiral phyllotaxy with associated axillary meristems is seen much later (Battey, 1985). It is worth noting, however, that even under constant SD conditions, in which a complete flower is formed, the growth pattern of the meristem is only weakly determinate and reiteration from the gynoecium can occur (Pouteau *et al.*, 1997, 1998). Analysis of the expression patterns of *Impatiens* homologues of *LFY* and *API* (*Imp-LFY* and *Imp-API*) has shown that *Imp-API* expression is associated with petal development and that *Imp-LFY* is expressed in the meristem in an unchanging pattern through vegetative, flowering, and reverting development (Pouteau *et al.*, 1997). Vegetative expression of *LFY* without up-regulation upon floral induction has been described in tobacco where it is not associated with reversion (Kelly *et al.*, 1995).

Physiological experiments show that reversion of *Impatiens* results from the failure of a leaf-derived signal to be supplied to the meristem during flower formation (Pouteau *et al.*, 1997). There is evidence to show that the meristem responds quantitatively to this leaf signal. Whilst plants revert if deprived of the signal, reduced signal may maintain flowering, but alter the form of the flower. Restricting the number of leaves (through their removal) which can perceive the inductive SD conditions results in flowers which may contain up to double the number of petals of the undefoliated controls (Tooke and Battey, 2000). Flower development appears to be prolonged by limited leaf-derived inductive signal; one interpretation of this is that this signal promotes the transition to C function.

In the purple-flowered line of *Impatiens*, plants continue to flower when transferred from SD to LD, but removal of the induced leaves (those unfolded in SD) causes reversion

(Tooke *et al.*, 1998). This indicates that a crucial difference between the flowering (purple-flowered) and reverting (red-flowered) lines is the ability of leaves to produce an inductive signal in the absence of inductive conditions. Thus, leaves of the flowering line deliver to the meristem a vital floral maintenance factor, either by self-perpetuation of the initial SD signal or by production of an autonomous signal in LD.

In recent work, the flowering (purple-flowered) and reverting (red-flowered) lines have been crossed to address the genetic basis for this difference. An unexpected result of this study is the appearance, in the F<sub>1</sub> and F<sub>2</sub> generations, of a novel reflowering line which neither continues to flower normally nor becomes fully reverted (to ongoing leaf initiation) when transferred from SD to LD (Fig. 3). The terminal flower in the reflowering phenotype is generally anomalous. Figure 4A and B show plants with prominent and numerous bract-like organs, whilst plants in Fig. 4C and D have excessive numbers of petals. In the subtlest cases of reflowering there is little internode elongation on reversion and plants display varying degrees of phyllody before continuing flower development.

In each progeny tested, 5SD+LD treatment produces three phenotypes: reverting, flowering, and reflowering. However, responses are not uniform, contrasting with the parental genotypes where phenotype is invariant and true-breeding, and variation has been found between experiments (F Tooke and N Battey, unpublished data).

Analysis of F<sub>1</sub>, F<sub>2</sub> and backcross progeny supports a single gene hypothesis as the simplest explanation for the observed phenotypes. Under this hypothesis the parent flowering line is AA and the reverting line, aa. The heterozygous genotype Aa has the novel reflowering phenotype but is leaky so that some of this genotype flower or, less frequently, revert. The effects of gene A appear to be dosage-dependent such that AA plants are largely unaffected by the switch from SD to LD; Aa plants undergo a brief reversion period (then reflower) and aa plants revert completely. Although the parent purple- and red-flowered lines are consistent in their flowering and reverting responses,

their F<sub>2</sub> progeny show clearly that flower colour and reversion response are not genetically linked. Therefore, in the F<sub>2</sub> generation, whilst a plant may be of genotype aa, the flower colour would not necessarily be red.

When combined with the previously described data on leaf signalling in purple- and red-flowered *Impatiens* (Pouteau *et al.*, 1997; Tooke *et al.*, 1998), these results suggest that in *Impatiens* a single gene controls the daylength-independent synthesis/transport of a leaf signal. The effect of the signal on floral development is quantitative (as described above) and this could, in part, explain the 'leakiness' of the heterozygous phenotype. In the absence of this function, the signal fails to reach the meristem in non-inductive conditions. Consistent with this, the purple-flowered line of *Impatiens* (that continues to flower in non-inductive LD unless its leaves are removed) can flower eventually in LD, whereas the SD requirement is absolute in the red-flowered line. Thus the occurrence of reversion in LD correlates with an inactive daylength-independent pathway.

This interpretation leads to the conclusion that, in *Impatiens*, floral commitment is a consequence of continued supply of leaf-derived floral signal to the meristem (see also Hempel *et al.*, 2000). But can this conclusion, that floral commitment is leaf-derived, be applied generally to other species? One possibility is that the susceptibility of *Impatiens* to revert in such a clear-cut manner results from the loss of floral signal combined with a peculiarity in the downstream, flower development process. Thus, in most other species a large number of interacting pathways give a generalized stability to flowering that leads to commitment or determination. A process with such a high degree of molecular redundancy may be inherently difficult to reverse once it has been initiated. Floral commitment may therefore be different in character from stable epigenetic changes that occur in plant development, such as vernalization. The underlying regulation of vernalization is now being revealed, and it is clearly brought about in a highly specific way (Gendall *et al.*, 2001; Sung and Amasino, 2004).

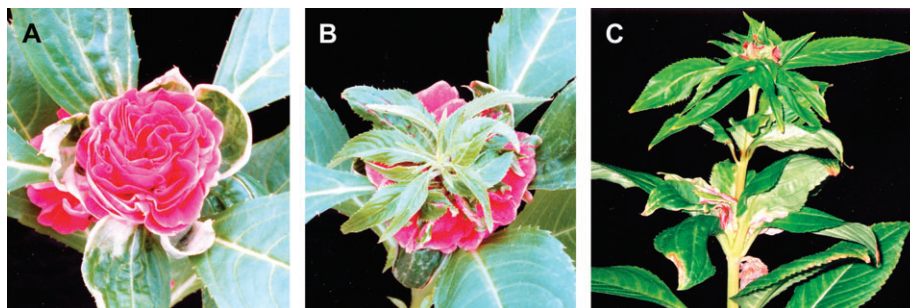

**Fig. 3.** Flowering, reverting and reflowering responses of *Impatiens* after 5 SD+LD treatment. (A) Top view of terminal flower showing flowering response. (B) Top view of reverting terminal flower. (A) and (B) show the typical responses observed in the parent lines, whilst (C) shows a novel reflowering phenotype in some of the progeny, in which a terminal flower is produced, but after an earlier phase of floral development and reversion.

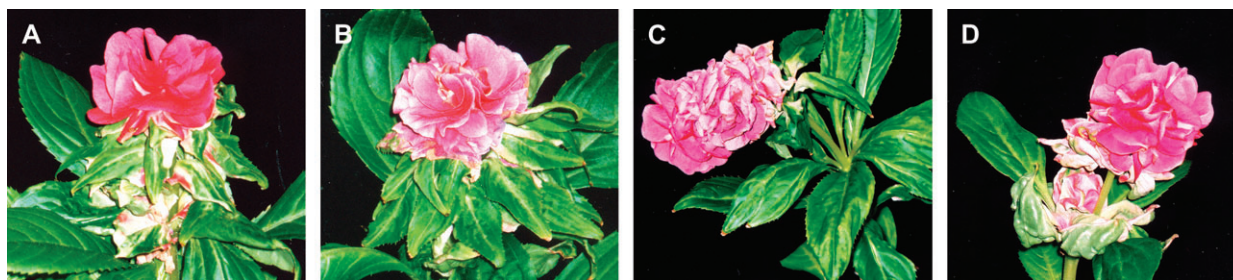

**Fig. 4.** Reflowering plants (after 5 SD+LD). (A, B) Prominent and numerous bracts. (C, D) Terminal flowers containing numerous petals. The plant in (C) produced 97 petals before the first stamen. (Terminal flowers which develop under SD conditions have approximately 20 petals.)

If this interpretation is correct, the failure of *Arabidopsis* to revert completely (i.e. to leaf production) may be the result of genetic redundancy in the multiple flowering pathways. In *Impatiens* it appears that a leaf-derived signal constantly regulates floral development at the meristem. The question that this analysis begs, however, is why floral development in *Impatiens* is so dependent on the leaf signal. This is discussed further in the Conclusions section of this review.

#### Other cases of reversion

Strong evidence that a leaf-derived signal controls flowering in *Zea mays* is provided by the *id1* mutant which is late flowering and displays vegetative characteristics in the inflorescence (Colasanti *et al.*, 1998). The *ID1* gene is only expressed in immature leaves, yet controls flowering at the meristem. This suggests that it plays a role in the synthesis or transport of a leaf-derived signal which induces and maintains flowering. In *Pisum*, flowering and reversion have been explained in terms of a 'balance model' with some similarities to the enabler and promoter interactions proposed for *Arabidopsis* (Boss *et al.*, 2004). Flower initiation in *Pisum* occurs when a threshold promoter:inhibitor ratio is exceeded through the activity of several independent loci (Murfet, 1971; Weller *et al.*, 1997). A fine balance exists though, and reversion can be observed in one specific genotype (If E Sn). 'Transient flowering' occurs on grafting variants of this genotype. Flowering is followed to varying extents by reversion and then a subsequent stable floral state. The shifting promoter:inhibitor dynamics within the plant as, for example, the scion grows larger or the inhibitory potential decays as the plant ages could explain this result (Murfet, 1971). Partial induction has also been described in this species; 'bracteose malformed inflorescences' develop if the number of inductive cycles is suboptimal (Murfet, 1985).

#### Floral determination in vitro

If reversion is considered to result from a lack of determination (commitment) in meristem developmental fate (Huala and Sussex, 1993), evidence on the general character of the determination process is relevant to it. Determi-

nation can be tested through experiments involving propagation of the plant, bud, meristem or cell in question, away from conditions (or signal sources) that induce inflorescence or floral fate (Huala and Sussex, 1993). *In vitro* culture is preferable to grafting for meristem and cell studies because it allows complete isolation and thus some control on growth conditions, for example, number of leaves, hormonal type/level, and nutrient sources (McDaniel *et al.*, 1992; Donnison and Francis, 1994).

Irish and Nelson (1991) have shown that the determination of inflorescence meristems can occur separately from that of flower primordia. *Zea mays* inflorescence meristems grown *in vitro* produced indeterminate vegetative structures with inflorescence phyllotaxy. Unless floral organ development had been initiated before isolation, meristems did not continue with normal flower (tassel) development. From this and related work it has become necessary to define a meristem by its phyllotaxy and other growth patterns and not the identity of organs it produces (Irish and Nelson, 1991; Huala and Sussex, 1993). For individual cells, determination can occur in a completely isolated meristem, in a meristem surrounded by a critical number of primordia, or outside the meristem (e.g. *Nicotiana* stem segments) (Singer and McDaniel, 1987; Ferguson *et al.*, 1991; Irish and Nelson, 1991; Huala and Sussex, 1993).

These results indicate that determination can occur at plant, meristem, primordium, and cell (even non-meristem cell) level with different requirements for each type of organizational unit or plant species. This could account for the organ mosaics observed in *Impatiens* and *Arabidopsis* in response to environmental and genetic manipulation, respectively (Battey and Lyndon, 1984, 1988; Ng and Yanovsky, 2001).

*In vitro* work has led to the suggestion that, in environment-responsive plants, non-reversion could be a result of the plants' capacity to prevent flowering in weak inductive conditions (Donnison and Francis, 1994). In this case, plants only flower when a threshold amount of signal has been received by the meristem. The timing of this event has been determined through *in vitro* meristem culture experiments in *Lolium temulentum* (McDaniel *et al.*, 1991). These authors reported that the amount of

signal affects flowering speed and extent of floral development in isolated meristems in a quantitative manner up to a saturation/optimum point (36 h in LD). Suboptimal signal levels do not result in reversion but rather slower flowering and abnormal flowers. In plants following this pattern, intact meristems flower after evocation and determination has been achieved so they do not revert when transferred to non-inductive conditions.

Work with *Silene coeli-rosa* (Donnison and Francis, 1994) suggests that there is another group of environment-responsive plants that do not normally revert, but do show reversion when the meristem is isolated from the plant. This observation is taken to indicate the continued need for signals from the whole plant for complete flowering. Floral determination occurs sequentially in the different whorls. Insufficient induction in these plants results in reversion after the last determined whorl. It has been suggested that intact meristems in these plants may not be permanently committed to flowering, but do not revert in non-inductive conditions because of a consistent supply of signals from the leaves.

In environment-neutral plants like *Nicotiana tabacum* and *Zea mays*, *in vitro* studies have shed light on the effect of age and node number on meristem phase change from juvenile to adult or vegetative to reproductive (Irish and Nelson, 1991; Irish and Jegla, 1997). The leaves act as a source of determination signal to the apical meristem and this signal is constantly necessary up to a certain stage. Meristems not receiving enough signal from the leaves or cultured too early will revert to juvenile (or vegetative) growth (Irish and Jegla, 1997).

### Meristem developmental plasticity

Reversion requires of the plant a flexibility to switch from floral to vegetative or inflorescence development. In *Titanotrichum oldhamii*, floral meristems may appear identical up to the ‘loaf’ stage of meristem development, but have the capacity beyond this point to take on one of three fates; floral, bulbil cluster, or a proliferation of bracts. The latter two are a form of reversion from flowering which tends to occur at the end of the season (Wang and Cronk, 2003). How is this flexibility achieved? One explanation could be that a subset of cells in the meristem retains an undifferentiated or vegetative identity which is reasserted on reversion. Another is that cells which are initially assigned a floral fate regain the ability to become vegetative.

In the *Arabidopsis lfy-6* mutant (described earlier) *in situ* hybridization experiments, designed to analyse the origin of the ectopic shoot, reveal that cells of the meristem and even some of those in the growing ectopic shoot express the floral organ identity gene *AG*. This implies that cells that are initially floral are reprogrammed during reversion (Okamuro *et al.*, 1996). This form of reprogramming may take place at a very subtle level. Hempel *et al.* (1997) have found that, although a plant may remain outwardly vege-

tative in appearance, it belies a ‘flowering bias’ detectable as a transient increase in the expression of *LFY* and *AGL8*.

In wild-type *Zea mays*, expression of *KNOTTED1 (KNI)*, a meristem-based gene is not detected during ovule development. *Zea mays ifa1* mutants suffer a loss of determinacy of all the usually determinate meristems (spikelet pair, spikelet, floral meristems) (Laudencia-Chingcuanco and Hake, 2002) and in these plants *KNI* expression reappears in a group of cells in the centre of the ovule. Thus meristematic fate appears to be regained at a molecular level.

Two models have been proposed for the reversion phenotypes of *Petunia* plants with engineered cosuppression of the MADS-box *SEPALLATA*-like gene, *FBP2* (Table 2), in which new inflorescences grow from the axils of carpels. In the first model, the lack of *FBP2* means that floral commitment is slow to become established and the floral transition is incomplete, with some cells retaining inflorescence identity. An alternative model is that a floral meristem forms but the lack of *FBP2* results in a flower in which the inflorescence character is not completely suppressed (Angenent *et al.*, 1994). The latter model has similarities to the mode of action of *LFY* in suppressing *TFL1* and *AGL24* in *Arabidopsis*.

It is of note that *STMADS16*, a *Solanum tuberosum* MADS-box gene with a high degree of similarity to *AGL24*, appears to superimpose a vegetative programme onto a flowering plant. Whilst wild-type expression is confined to vegetative development, heterologous expression in *Nicotiana tabacum* results in phenotypic alterations to the flower, for example, longer internodes in the inflorescence, sepals replaced by leaves (Garcia-Morato *et al.*, 2000).

A common theme to these molecular reports is that floral maintenance is achieved through repression of vegetative or inflorescence development, suggesting that these forms of development are a type of default pathway onto which flowering may be superimposed. Mutations in *ZFL1* and *ZFL2*, *LFY* homologues in *Zea mays*, can in older plants result in ectopic vegetative outgrowths from floral organs (Bomblyes *et al.*, 2003). This coexistence of vegetative and floral development is interpreted as a loss of an abrupt transition between the two phases of development. In *ifa1* mutants (see above), however, reversion is always to a distinct, specific and not mixed meristem type (Laudencia-Chingcuanco and Hake, 2002).

## Function of flower and inflorescence reversion

### Perenniality

One of the outstanding problems for plant developmental biologists is to provide a mechanistic account of life-history strategy. The regulation of individual developmental events, such as flowering, fruiting, and senescence is now relatively well-understood; so is the metabolic regulation that underpins day-to-day plant existence. But the



correlative controls that connect these two levels, and are so characteristic of plants (Woolhouse, 1983; Hensel *et al.*, 1994; Noodén and Penney, 2001) are now ripe for renewed exploration. Viewed in this context, flowering of an individual meristem becomes part of a wider process, in which the fate of the whole plant is determined. In an annual such as *Arabidopsis*, flowering is irreversible, global, and leads to fruiting and plant death. The species is therefore monocarpic. Some ecotypes with a high vernalization requirement can behave as winter annuals, or biennials if spring-sown (Michaels and Amasino, 2000). Nevertheless, flowering still results in plant death. The majority of plant species, however, are perennial: flowering occurs locally and is associated with the senescence and death of only part of the individual (Battey and Tooke, 2002). Crucially, some meristems do not adopt a floral fate and therefore provide the basis for continued growth the next season. This polycarpic life-history requires global controls over meristem behaviour and organ development that are currently not well understood. Does reversion, allowing a return to the vegetative mode after flowering, have any relevance to life-history strategy?

There is little evidence that flower reversion has adaptive significance; it seems just to be a developmental abnormality. Inflorescence reversion, however, can provide a means for the individual axes of a plant to switch repeatedly between vegetative and reproductive development. An interesting example of this is the Ravenelle wallflower (Diomaiuto, 1988). Cold temperature (5 °C) is required for the first transition to flowering, and is also good for flower emergence. However, inflorescence reversion eventually takes place at this temperature and a second flowering phase will only occur after a period of at least 3 weeks at higher temperature (22 °C), followed by a return to cold conditions (5 °C). After studying this process for 5 years, Diomaiuto concluded that the cycling between vegetative and reproductive growth coincides with the warm and cold summer/winter conditions of temperate regions. Thus inflorescence reversion provides a mechanism for ensuring a polycarpic perennial life-history in this species.

In a similar way, individual shoots of the bottlebrush plant (*Callistemon*) revert to vegetative growth after the inflorescence phase, so that the form of the plant shows the history of successive flowering phases (Fig. 5). In another member of the Myrtaceae, *Metrosideros*, it has been proposed that the attainment of reproductive competence is a consequence of the tree reaching a certain degree of branching complexity (Clemens *et al.*, 2002; Sismilich *et al.*, 2003). Extreme branching complexity, however, leads to a reduction in the number of vegetative meristems and this threatens the capacity of the tree for further growth. In this situation, inflorescence reversion to vegetative growth occurs with increased frequency to generate new vegetative capacity (Sreekantan *et al.*, 2001; J Clemens, personal communication). In this case, reversion emerges

as an important mechanism for maintaining the balance between vegetative and reproductive development in the polycarpic perennial life-history strategy of the tree.

The crucial question in these examples of inflorescence reversion is: what is the nature of inflorescence identity? Is the inflorescence meristem different from the vegetative meristem in an important functional sense, in which case the (floral) fate of its axillary meristems would be a consequence of its altered developmental trajectory? Or is it just a meristem protected from adopting a floral fate? Based on studies with *Arabidopsis* (Bradley *et al.*, 1997), *Lolium* (Jensen *et al.*, 2001), and *Metrosideros* (Sreekantan *et al.*, 2004), *TFL* is the obvious candidate for this protective role, and the mechanism for *TFL* suppression, without accompanying *LFY* up-regulation, then emerges as the key to inflorescence reversion.

### *Pseudovivipary*

Flowering leads to sexual reproduction of the plant; yet in some cases this outcome to the flowering process is not inevitable and is under environmental control. Pseudovivipary is a form of inflorescence proliferation in which the flowering process is aborted and further development produces leafy shoots or bulbils. Pseudovivipary, therefore, provides an alternative means to reproduce. This asexual adaptation is particularly prominent in species growing in extreme environments. It is found in the recently glaciated areas of the Northern hemisphere and high latitudes in the Southern hemisphere (Moore and Doggett, 1976). Characteristics of the environments which favour pseudovivipary include high precipitation and humidity, strongly seasonal climates, high altitudes and latitudes (arctic, alpine), late-thawing habitats, or arid/semi-arid areas (Lee

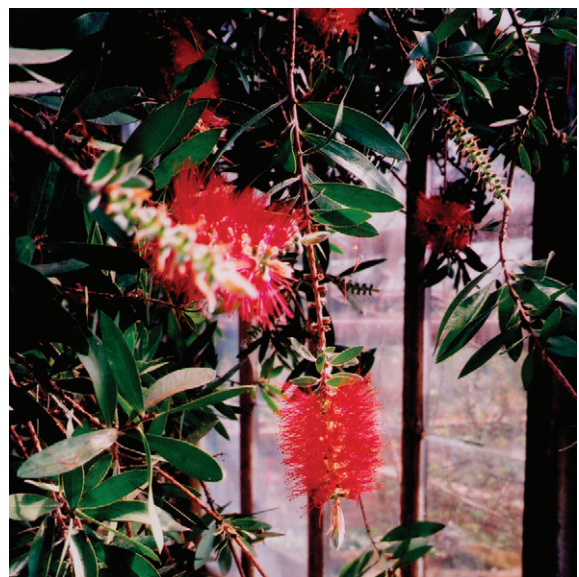

Fig. 5. *Callistemon*. The inflorescence reverts to vegetative growth.

and Harmer, 1980; Molau, 1993; Elmqvist and Cox, 1996). Around 1.5% of tundra species can show pseudovivipary (Lee and Harmer, 1980; Walter, 1985) and in areas of Svalbard and the NW Queen Elizabeth Islands it is found in >10% of species (Lee and Harmer, 1980).

Species which show pseudovivipary are generally perennials and very often grasses, for example, *Festuca vivipara*, *Poa alpina vivipara*, *Deschampsia alpina* (Molau, 1993; Elmqvist and Cox, 1996). Late-flowering can also be a factor and may be a key to the developmental process and its advantages. In studying reproductive strategies of Tundra plants, Molau (1993) suggests that late-flowering makes time a limiting resource. Many mechanisms for outbreeding (e.g. reduced self-compatibility) are available to the time-unlimited early-flowering species, but such selection processes could be reduced for species in late-thawing habitats. These late-flowering plants take a seed-risking (selfing) rather than a pollen-risking (dispersal) strategy (Molau, 1993). Expanding this idea, vegetative reproduction, by means of reversion to leafy shoot production, could be viewed as further insurance of successful reproduction. As Latting (1972) suggests, pseudovivipary offers a means to cope with short growing seasons by allowing rapid plant establishment.

In developmental terms there are two main ways in which pseudovivipary occurs; proliferation may be achieved by lemma elongation to form the first leaf of the plantlet, as is the case in *Deschampsia*, or by transformation of the spikelet to a leafy shoot (*Festuca ovina*, *Poa alpina*, *Poa bulbosa*) (Moore and Doggett, 1976). A distinction can be drawn between proliferations giving rise to leaves after flowering spikelets (reversion) and those akin to 'vegetative inflorescences' (incomplete flowering) (Battey and Lyndon, 1990).

In grasses showing pseudoviviparous development it is induced by marginal LD induction, i.e. weakly inductive conditions (Heide, 1994). In some cases it has been assimilated as a heritable response, but it is not usually an irreversible pattern of development beyond environmental influence (Evans, 1964). Habitually pseudoviviparous grasses can be induced to flower (although flowering is not completely normal) given optimal inductive conditions (Heide, 1994). Since floral initiation can occur, meristem competence to respond to floral promotion appears to be established. Latting (1972) described pseudovivipary as, 'an expression of the shifting balance of factors controlling vegetative or floral development'. It is the promotion of the shift towards floral development which appears weak. There are similarities here with the reversion of *Impatiens balsamina*. Given optimal inductive conditions (continuous SD), *Impatiens* will flower and produce seed yet, even as it does so, the ability to proliferate is evident in the reiterative growth of the gynoeceum. Abandoning flowering to produce a leafy shoot is the result of weak induction. Perhaps, as proposed for *Impatiens*, pseudoviviparous

development is a feature of plants lacking sufficient genetic redundancy to commit the plant to flowering. Here, the vulnerability of floral development to environmental conditions ensures flowering always results in reproduction, either sexual or asexual.

## Conclusions

The recent studies of flowering of *Arabidopsis thaliana* have been a guide to the principal components of the reversion process and have presented clear models of how floral maintenance might be achieved. Interestingly, reversion of *Arabidopsis* is never a complete return to vegetative development. The relative difficulty of obtaining reversion, and the residual floral characteristics when it does occur may be a consequence of the genetic redundancy in flowering pathways of this plant.

In this case, 'floral commitment' may just be a consequence of the stability conferred on flowering in *Arabidopsis*, a process that once started has many different routes to completion. The early establishment of 'commitment' in *Arabidopsis* (Bradley *et al.*, 1997), and the utility of certain genes as markers for it (e.g. *API*, Hempel *et al.*, 1997), do not constitute proof that it is a specifically regulated step. In fact, the single gene mutations in *Arabidopsis* giving rise to reversion to inflorescence development do so only when plants are grown in weakly-inductive SD conditions.

In *Impatiens balsamina*, genetic analysis of a red-flowered line which reverts to vegetative development, and a purple-flowered line which maintains flowering when removed from inductive conditions, suggests that a single gene controls these different responses. Evidence from *Impatiens* contributes to the continuing physiological question as to the site of regulation of floral commitment. In accordance with results from analysis of the maize *id1* mutant and certain *in vitro* studies, flowering in *Impatiens* appears to be controlled by a leaf-derived signal, operating in a quantitative manner to promote flowering. The striking reversion at the meristem when the supply of leaf signal is shut off is a consequence of the organization of flower development. Thus, both the flowering and reverting lines require the leaf-derived signal to complete flowering; the difference is that in the flowering line the production/transport of the signal does not depend on continued inductive conditions (Tooke *et al.*, 1998; Hempel *et al.*, 2000). *Impatiens* may lack the level of redundancy required for the commitment of the meristem which is present in *Arabidopsis*. The reverted meristem shows some significant floral characteristics: the leaves are in floral (whorled) phyllotaxy and lack axillary meristems. This suggests that the floral development programme fails at the stage of floral organ differentiation.

One difference between *Arabidopsis* and *Impatiens* is the expression pattern of *LFY* and its *Impatiens* homologue *IMP-LFY*. *IMP-LFY* is not up-regulated during flowering and the expression level remains constant through vegetative growth,

flowering, and reversion. This low level of expression may be insufficient either to activate or to repress the *Impatiens* homologues of *AG* or *AGL24*. The examples above demonstrate that these genes have a role in floral meristem determinacy in *Arabidopsis*, and that a low level of *LFY* expression is key to a number of the instances of reversion.

The final stage of floral determinacy, conferred by *AG*, may also be a factor in the reiteration of growth from the gynoecium in *Impatiens*. The limited expression of *IMP-LFY*, and possibly the *Impatiens* *AG* homologue, may in part be responsible for the plasticity of floral formula in the terminal flower. The leaf-derived signal would then be required to act in promoting flowering in the absence of the decisive control by *IMP-LFY*.

The genetic mechanisms underlying floral maintenance show a close association with environmental factors. Their vulnerability to weakly-inductive conditions or their mutation can lead to strikingly anomalous flowering. These characteristics appear to be able to attune reproductive habit to ecological niche, allowing prominence of vegetative development over floral. In this way meristems can be conserved for a perennial lifecycle or for reproduction by asexual means rather than by seed.

## Acknowledgements

We would like to thank Mike Wilkinson and Brendan Davies for advice on the *Impatiens* genetics work. We are grateful for the support of the Stanley Smith Horticultural (UK) Trust, Lucy Cavendish College, Cambridge, the Felix Trust, and the UK Biotechnology and Biological Sciences Research Council.

## References

- Ampomah-Dwamena C, Morris BA, Sutherland P, Veit B, Yao J-L. 2002. Down-regulation of *TM29*, a tomato *SEPALLATA* homologue causes parthenocarpic fruit development and floral reversion. *Plant Physiology* **130**, 605–617.
- An H, Clotilde R, Suárez-Lopez P, et al. 2004. *CONSTANS* acts in the phloem to regulate a systemic signal that induces photoperiodic flowering in *Arabidopsis*. *Development* **131**, 3615–3626.
- Angenent GC, Franken J, Busscher M, Weiss D, van Tunen AJ. 1994. Co-suppression of the *Petunia* homeotic gene *fbp2* affects the identity of the generative meristem. *The Plant Journal* **5**, 33–44.
- Batley NH. 1985. Growth and development at the shoot apex of *Impatiens balsamina* L. during flowering and reversion. PhD thesis, University of Edinburgh.
- Batley NH, Lyndon RF. 1984. Changes in apical growth and phyllotaxis on flowering and reversion in *Impatiens balsamina* L. *Annals of Botany* **54**, 553–567.
- Batley NH, Lyndon RF. 1986. Apical growth and modification of the development of primordia during re-flowering of reverted plants of *Impatiens balsamina* L. *Annals of Botany* **58**, 333–341.
- Batley NH, Lyndon RF. 1988. Determination and differentiation of leaf and petal primordia in *Impatiens balsamina*. *Annals of Botany* **61**, 9–16.
- Batley NH, Lyndon RF. 1990. Reversion of flowering. *Botanical Review* **56**, 162–189.
- Batley NH, Tooke F. 2002. Molecular control and variation in the floral transition. *Current Opinion in Plant Biology* **5**, 62–68.
- Blazquez MA, Green R, Nilsson O, Sussman MR, Weigel D. 1998. Gibberellins promote flowering of *Arabidopsis* by activating the *LEAFY* promoter. *The Plant Cell* **10**, 791–800.
- Bombliès K, Wang R-L, Ambrose BA, Schmidt RJ, Meeley RB, Doebley J. 2003. Duplicate *FLORICAULA/LEAFY* homologs *zfl1* and *zfl2* control inflorescence architecture and flower patterning in maize. *Development* **130**, 2385–2395.
- Boss PK, Bastow RM, Mylne JS, Dean C. 2004. Multiple pathways in the decision to flower: enabling, promoting and resetting. *The Plant Cell* **16**, S18–S31.
- Bradley D, Ratcliffe O, Vincent C, Carpenter R, Coen E. 1997. Inflorescence commitment and architecture in *Arabidopsis*. *Science* **275**, 80–83.
- Busch MA, Bombliès K, Weigel D. 1999. Activation of a floral homeotic gene in *Arabidopsis*. *Science* **285**, 585–587.
- Clemens J, Henriod R, Sismilich M, Sreekantan L, Jameson PE. 2002. A woody perspective of flowering. *Flowering Newsletter* **33**, 17–22.
- Colasanti J, Yuan Z, Sundaresan V. 1998. The *indeterminate* gene encodes a zinc finger protein and regulates a leaf-generated signal required for the transition to flowering in maize. *Cell* **93**, 593–603.
- Day JS, Loveys BR, Aspinall D. 1994. Environmental control of flowering in *Boronia megastigma* (Rutaceae) and *Hypocalymma angustifolium* (Myrtaceae). *Australian Journal of Botany* **42**, 219–229.
- Diomaiuto J. 1988. Periodic flowering or continual flowering as a function of temperature in a perennial species: the Ravenelle wallflower (*Cheiranthus cheiri* L.). *Phytomorphology* **38**, 163–171.
- Donnison IS, Francis D. 1994. Experimental control of floral reversion in isolated shoot apices of the long-day plant *Silene coeli-rosa*. *Physiologia Plantarum* **92**, 329–335.
- Elmqvist T, Cox PA. 1996. The evolution of vivipary in flowering plants. *Oikos* **77**, 3–9.
- Evans LT. 1964. Reproduction. In: Barnard C, ed. *Grasses and grasslands*. London: Mcmillan, 126–153.
- Ferguson CJ, Huber SC, Hong PH, Singer SR. 1991. Determination for inflorescence development is a stable state, separable from determination for floral development in *Pisum sativum* L. buds. *Planta* **185**, 518–522.
- Fletcher JC. 2002. Coordination of cell proliferation and cell fate decisions in the angiosperm shoot apical meristem. *BioEssays* **24**, 27–37.
- García-Morato F, Ortega N, Lozano R, Carmona M-J. 2000. Characterization of the potato MADS-box gene *STMADS16* and expression analysis in tobacco transgenic plants. *Plant Molecular Biology* **42**, 499–513.
- Gendall AR, Levy YY, Wilson A, Dean C. 2001. The *VERNALIZATION2* gene mediates the epigenetic regulation of vernalization in *Arabidopsis*. *Cell* **107**, 525–535.
- Gisel A, Hempel FD, Barella S, Zambryski P. 2002. Leaf-to-shoot apex movement of symplastic tracer is coincident with flowering in *Arabidopsis*. *Proceedings of the National Academy of Sciences, USA* **99**, 1713–1717.
- Heide OM. 1994. Control of flowering and reproduction in temperate grasses. *New Phytologist* **128**, 347–362.
- Hempel FD, Weigel D, Mandel MA, Ditta G, Zambryski PC, Feldman LJ, Yanofsky MF. 1997. Floral determination and expression of floral regulatory genes in *Arabidopsis*. *Development* **124**, 3845–3853.
- Hempel FD, Welch DR, Feldman LJ. 2000. Floral induction and determination: where is flowering controlled? *Trends in Plant Science* **5**, 17–21.

- Hensel LL, Nelson MA, Richmond TA, Bleecker AB. 1994. The fate of inflorescence meristems is controlled by developing fruits in *Arabidopsis*. *Plant Physiology* **106**, 863–876.
- Huala E, Sussex IM. 1993. Determination and cell interactions in reproductive meristems. *The Plant Cell* **5**, 1157–1165.
- Irish E, Jegla D. 1997. Regulation of extent of vegetative development of the maize shoot meristem. *The Plant Journal* **11**, 63–71.
- Irish E, Nelson TM. 1991. Identification of multiple stages in the conversion of maize meristems from vegetative to floral development. *Development* **112**, 891–898.
- Jack T. 2004. Molecular and genetic mechanisms of floral control. *The Plant Cell* **16**, S1–S17.
- Jensen CS, Salchert K, Nielsen KK. 2001. A *TERMINAL FLOWER1*-like gene from perennial ryegrass involved in floral transition and axillary meristem identity. *Plant Physiology* **125**, 1517–1528.
- Kefu Z, Hai F, Xingyu J, San Z. 2002. Critical daylength and photoinductive cycles for the induction of flowering in halophyte *Suaeda salsa*. *Plant Science* **162**, 27–31.
- Kelly AJ, Bonnlander MB, Meeks-Wagner DR. 1995. *NFL*, the tobacco homolog of *FLORICAULA* and *LEAFY*, is transcriptionally expressed in both vegetative and floral meristems. *The Plant Cell* **7**, 225–234.
- King RW. 1998. Dual control of flower initiation and development by temperature and photoperiod in *Hardenbergia violacea*. *Australian Journal of Botany* **46**, 65–74.
- Landers KF. 1995. Vernalization responses in narrow-leaved lupin (*Lupinus angustifolius*) genotypes. *Australian Journal of Agricultural Research* **46**, 1011–1025.
- Latting J. 1972. Differentiation in the grass inflorescence. In: Younger VB, McKell CM, eds. *The biology and utilization of grasses*. New York: Academic Press, 365–399.
- Laudencia-Chingcuanco D, Hake S. 2002. The *indeterminate floral apex1* gene regulates meristem determinacy and identity in the maize inflorescence. *Development* **129**, 2629–2638.
- Lee JA, Harmer R. 1980. Vivipary, a reproductive strategy in response to environmental stress? *Oikos* **35**, 254–265.
- Lenhard M, Bohnert A, Jürgens G, Laux T. 2001. Termination of stem cell maintenance in *Arabidopsis* floral meristems by interactions between *WUSCHEL* and *AGAMOUS*. *Cell* **105**, 805–814.
- Lohmann JU, Hong RL, Hobe M, Busch MA, Parcy F, Simon R, Weigel D. 2001. A molecular link between stem cell regulation and floral patterning in *Arabidopsis*. *Cell* **105**, 793–803.
- McDaniel CN, King RW, Evans LT. 1991. Floral determination and *in vitro* floral differentiation in isolated shoot apices of *Lolium temulentum* L. *Planta* **185**, 9–16.
- McDaniel CN, Singer SR, Smith SME. 1992. Developmental states associated with the floral transition. *Developmental Biology* **153**, 59–69.
- Michaels SD, Amasino R. 2000. Memories of winter: vernalization and the competence to flower. *Plant, Cell and Environment* **23**, 1145–1153.
- Mizukami Y, Ma H. 1997. Determination of *Arabidopsis* floral meristem identity by *AGAMOUS*. *The Plant Cell* **9**, 393–408.
- Molau U. 1993. Relationships between flowering phenology and life history strategies in tundra plants. *Arctic and Alpine Research* **25**, 391–402.
- Molinero-Rosales N, Latorre A, Jamilena M, Lozano R. 2004. *SINGLE FLOWER TRUSS* regulates the transition and maintenance of flowering in tomato. *Planta* **218**, 427–434.
- Moncur MW. 1992. Effect of low temperature on floral induction of *Eucalyptus lansdowneana* F. Muell. & J. Brown subsp. *lansdowneana*. *Australian Journal of Botany* **40**, 157–167.
- Moore DM, Doggett MC. 1976. Pseudovivipary in Fuegian and Falkland Islands grasses. *British Antarctic Survey Bulletin* **43**, 103–110.
- Murfet IC. 1971. Flowering in *Pisum*: reciprocal grafts between known genotypes. *Australian Journal of Biological Science* **24**, 1089–1101.
- Murfet IC. 1985. *Pisum sativum*. In: Halevy AH, ed. *Handbook of flowering*. Vol. IV. Boca Raton, Florida: CRC Press, 97–126.
- Ng M, Yanofsky MF. 2001. Activation of the *Arabidopsis* B Class homeotic genes by *APETALA1*. *The Plant Cell* **13**, 739–753.
- Noodén LD, Penney JP. 2001. Correlative controls of senescence and plant death in *Arabidopsis thaliana* (Brassicaceae). *Journal of Experimental Botany* **52**, 2151–2159.
- Okamoto JK, Den Boer BGW, Lotys-Prass C, Szeto W, Jofuku KD. 1996. Flowers into shoots: photo and hormonal control of a meristem identity switch in *Arabidopsis*. *Proceedings of the National Academy of Sciences, USA* **93**, 13831–13836.
- Parcy F, Bomblies K, Weigel D. 2002. Interaction of *LEAFY*, *AGAMOUS* and *TERMINAL FLOWER1* in maintaining floral meristem identity in *Arabidopsis*. *Development* **129**, 2519–2527.
- Parcy F, Nilsson O, Busch MA, Lee I, Weigel D. 1998. A genetic framework for floral patterning. *Nature* **395**, 561–566.
- Poduska B, Humphrey T, Redweik A, Grbić V. 2003. The synergistic activation of *FLOWERING LOCUS C* by *FRIGIDA* and a new flowering gene *AERIAL ROSETTE 1* underlies a novel morphology in *Arabidopsis*. *Genetics* **163**, 1457–1465.
- Pouteau S, Nicholls D, Tooke F, Coen E, Battey N. 1997. The induction and maintenance of flowering in *Impatiens*. *Development* **124**, 3343–3351.
- Pouteau S, Tooke F, Battey N. 1998. Quantitative control of inflorescence formation in *Impatiens balsamina*. *Plant Physiology* **118**, 1191–1201.
- Ruiz-Garcia L, Madueño F, Wilkinson M, Haughn G, Salinas J, Martinez-Zapater JM. 1997. Different roles of flowering-time genes in activation of floral initiation genes in *Arabidopsis*. *The Plant Cell* **9**, 1921–1934.
- Schoof H, Lenhard M, Haecker A, Mayer KFX, Jürgens G, Laux T. 2000. The stem cell population of *Arabidopsis* shoot meristems is maintained by a regulatory loop between the *CLAVATA* and *WUSCHEL* genes. *Cell* **100**, 635–644.
- Simpson GG, Dean C. 2002. *Arabidopsis*, the Rosetta stone of flowering time? *Science* **296**, 285–289.
- Singer SR, McDaniel CN. 1987. Floral determination in internode tissues of day-neutral tobacco first occurs many nodes below the apex. *Proceedings of the National Academy of Sciences, USA* **84**, 2790–2792.
- Sismilich M, Menzies MI, Gandar PW, Jameson PE, Clemens J. 2003. Development of a mathematical method for classifying and comparing tree architecture using parameters from a topological model of a trifurcating botanical tree. *Journal of Theoretical Biology* **220**, 371–391.
- Sreekantan L, Clemens J, McKenzie MJ, Lenton JR, Croker SJ, Jameson PE. 2004. Flowering genes in *Metrosideros* fit a broad herbaceous model encompassing *Arabidopsis* and *Antirrhinum*. *Physiologia Plantarum* **121**, 163–173.
- Sreekantan L, McKenzie MJ, Jameson PE, Clemens J. 2001. Cycles of floral and vegetative development in *Metrosideros excelsa* (Myrtaceae). *International Journal of Plant Sciences* **162**, 719–727.
- Sung SB, Amasino RM. 2004. Vernalization and epigenetics: how plants remember winter. *Current Opinion in Plant Biology* **7**, 4–10.
- Tooke F, Battey NH. 2000. A leaf-derived signal is a quantitative determinant of floral form in *Impatiens*. *The Plant Cell* **12**, 1837–1847.
- Tooke F, Battey N. 2003. Tansley Review. Models of shoot apical meristem function. *New Phytologist* **159**, 37–52.

- Tooke F, Pouteau S, Battey N.** 1998. Non-reversion of *Impatiens* in the absence of meristem commitment. *Journal of Experimental Botany* **49**, 1681–1688.
- Walter H.** 1985. *Vegetation of the Earth and ecological systems of the geo-biosphere*, 3rd edn. Berlin: Springer-Verlag.
- Wang C-N, Cronk QCB.** 2003. Meristem fate and bulbil formation in *Titanotrichum* (Gesneriaceae). *American Journal of Botany* **90**, 1696–1707.
- Wang YZ.** 2001. Reversion of floral development under adverse ecological conditions in *Whytockia bijieensis* (Gesneriaceae). *Australian Journal of Botany* **49**, 253–258.
- Washburn CF, Thomas JF.** 2000. Reversion of flowering in *Glycine max* (Fabaceae). *American Journal of Botany* **87**, 1425–1438.
- Weigel D, Alvarez J, Smyth DR, Yanofsky MF, Meyerowitz EM.** 1992. *LEAFY* controls floral meristem identity in *Arabidopsis*. *Cell* **69**, 843–859.
- Weigel D, Nilsson O.** 1995. A developmental switch sufficient for flower initiation in diverse plants. *Nature* **377**, 495–500.
- Weller JL, Reid JB, Taylor SA, Murfet IC.** 1997. The genetic control of flowering in pea. *Trends in Plant Science* **2**, 412–418.
- Woolhouse HW.** 1983. Hormonal control of senescence allied to reproduction in plants. In: Meudt WJ, ed. *Beltsville symposia in agricultural research: strategies of plant reproduction*. London: Allanheld and Osmun, 201–236.
- Yanofsky MF, Ma H, Bowman JL, Drews GN, Feldmann KA, Meyerowitz EM.** 1990. The protein encoded by the *Arabidopsis* homeotic gene *AGAMOUS* resembles transcription factors. *Nature* **346**, 35–39.
- Yu H, Ito T, Wellmer F, Meyerowitz EM.** 2004. Repression of *AGAMOUS-LIKE 24* is a crucial step in promoting flower development. *Nature Genetics* **36**, 157–161.
